# Supplementary material for: Genome-wide Characteristics, Antibiotic Resistance, and Pathogenicity Analysis of Streptococcus parasuis Strains Isolated from Diseased Pigs
Source: Research Square preprint supplement (doi:10.21203/rs.3.rs-8212858/v1), 2025-12-26
Supplement: Supplementary file 1 [file 496fcaff200bb33bb16c412c.docx]

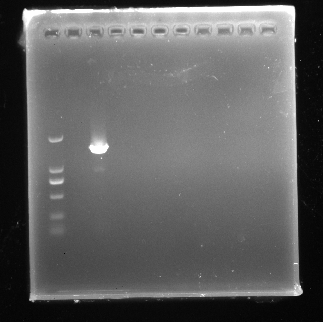


Fig. 1-F


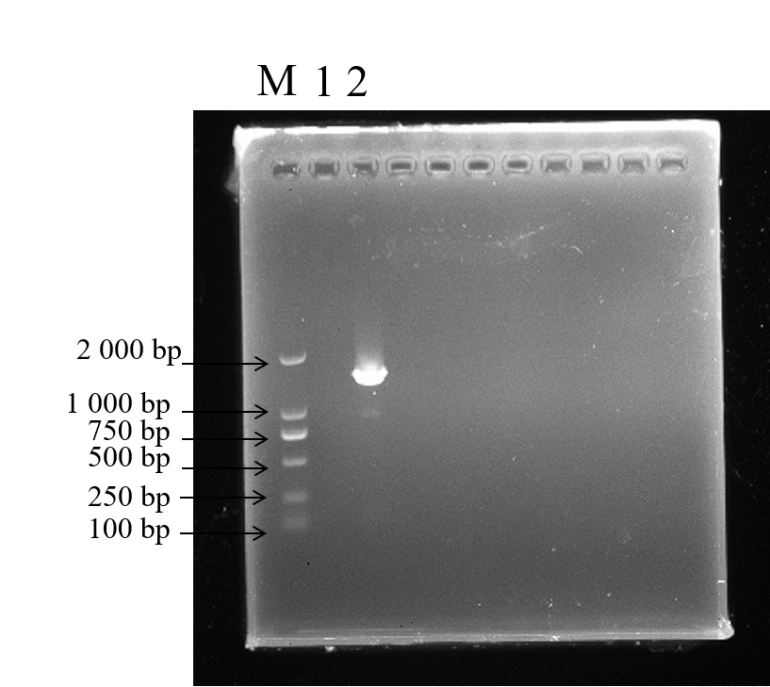


Note: M: marker; 1: blank; 2: A1

Here I have included two electrophoresis gel images, both representing F in Figure 1. The first image is the unlabeled original without any processing, while the second image has been annotated.
